# Supplementary material
Source: Springer Nature journal article supplement (https://www.springermedizin.de/resource/supplementary/12943_2013_1475_MOESM16_ESM.pdf/9552910)

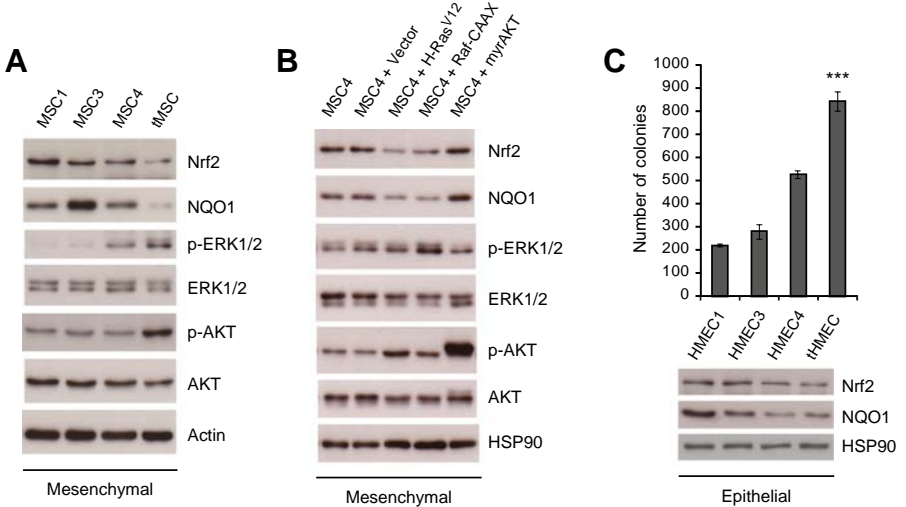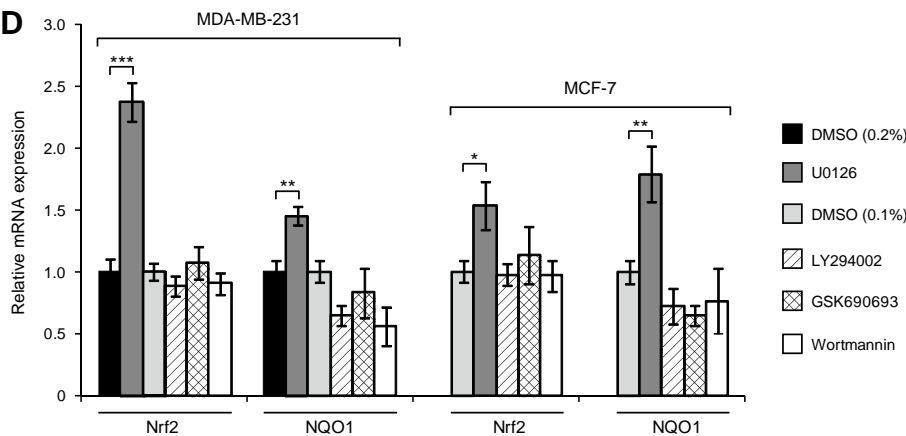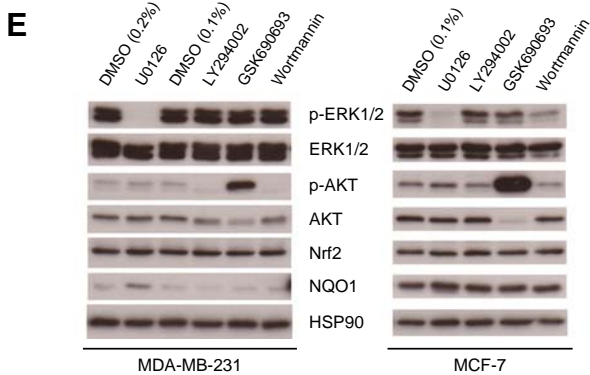

Supplement: MOESM16 [file 9552910]
